# Supplementary material for: An effective photocatalytic hydrogen evolution strategy based on tunable band gap (CuIn)xZn2(1−x)S2combined with amorphous molybdenum sulfide
Source: Royal Society of Chemistry journal article supplement (doi:10.1039/d1nj00812a), 2021-01-01
Supplement: d1nj00812a1.pdf [file d1nj00812a1.pdf]

## Supporting information

### An effective photocatalytic hydrogen evolution strategy based on tunable band gap $(\text{CuIn})_x\text{Zn}_{2(1-x)}\text{S}_2$ combined with amorphous molybdenum sulfide

Yanren Cao<sup>a</sup>, Haiyan Li<sup>a</sup>, Jingyi Jin<sup>a</sup>, Yanxin Li<sup>a</sup>, Ting Feng<sup>a</sup>, WeiWang<sup>a,b</sup>, Bohua Dong<sup>\*a</sup>, Lixin Cao<sup>\*a</sup>

<sup>a</sup> School of Materials Science and Engineering, Ocean University of China, Qingdao, 266100, P. R. China

<sup>b</sup> Aramco Research Center-Boston, Aramco Services Company, Cambridge, MA 02139, USA

\* Corresponding Author: E-mail: caolixin@ouc.edu.cn; E-mail: dongbohua@ouc.edu.cn

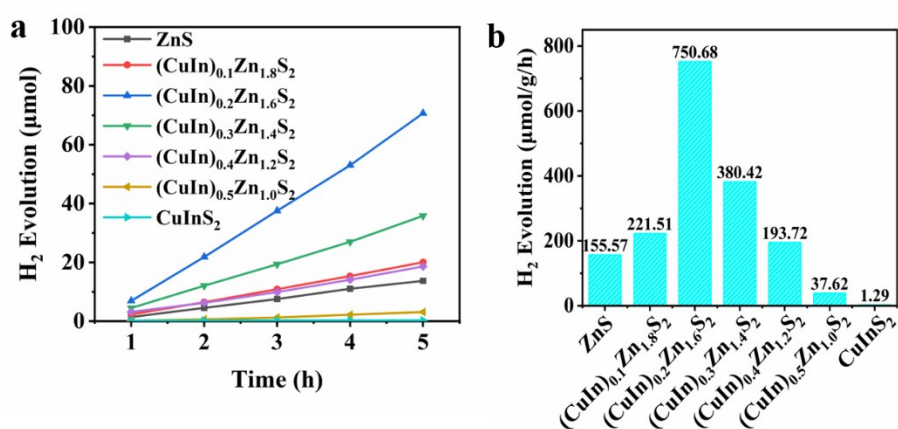

Fig. S1 (a) Time-dependent photocatalytic H<sub>2</sub> evolution on  $(\text{CuIn})_x\text{Zn}_{2(1-x)}\text{S}_2$ ; (b) Comparison of the H<sub>2</sub> evolution rate under visible light irradiation on  $(\text{CuIn})_x\text{Zn}_{2(1-x)}\text{S}_2$ .

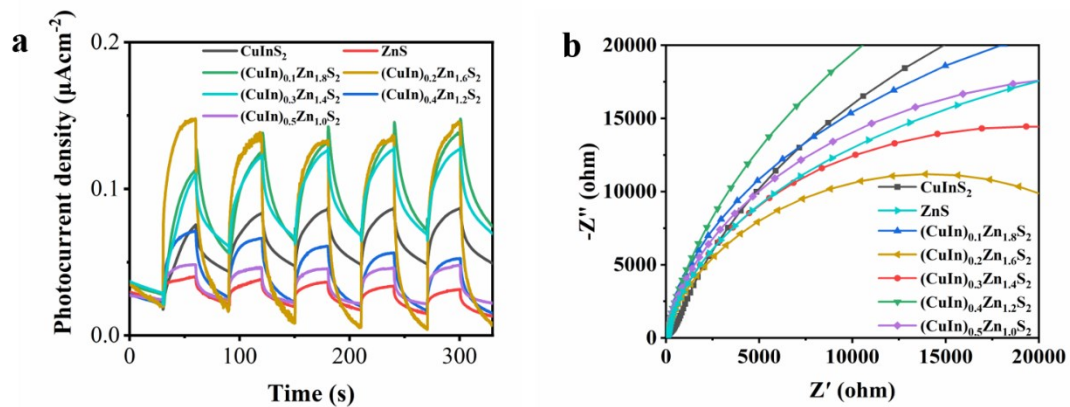

Fig. S2 The photocurrent response and EIS of the  $(\text{CuIn})_x\text{Zn}_{2(1-x)}\text{S}_2$  solid solution.

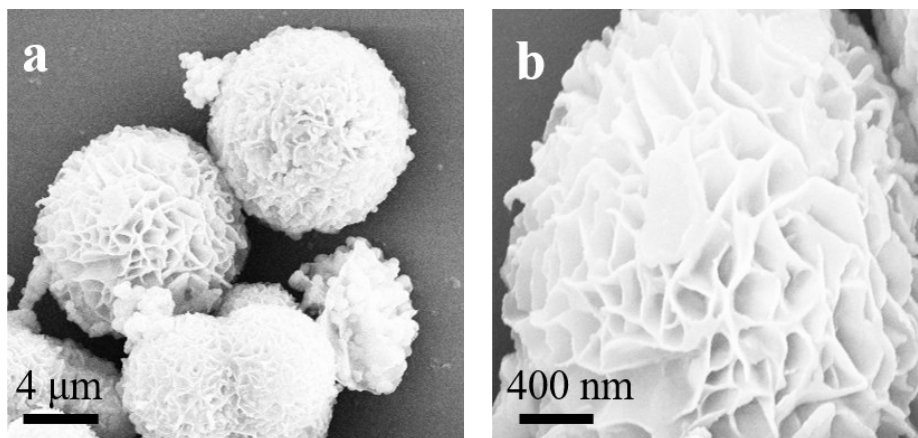

Fig. S3 SEM images of CIZS.

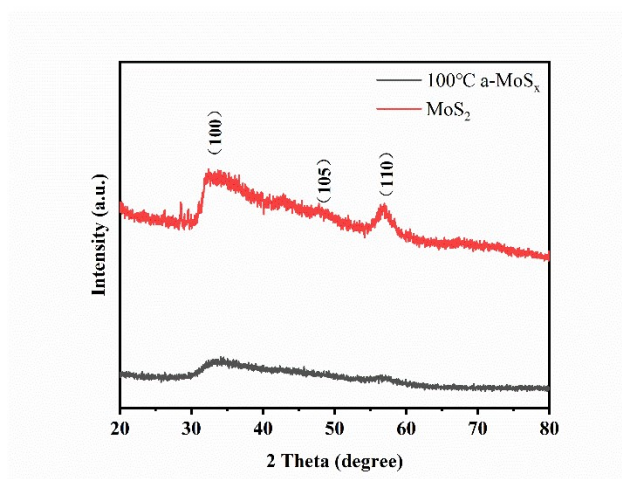

Fig. S4 The XRD patterns of the individual  $\text{MoS}_2$  and  $\text{a-MoS}_x$ .

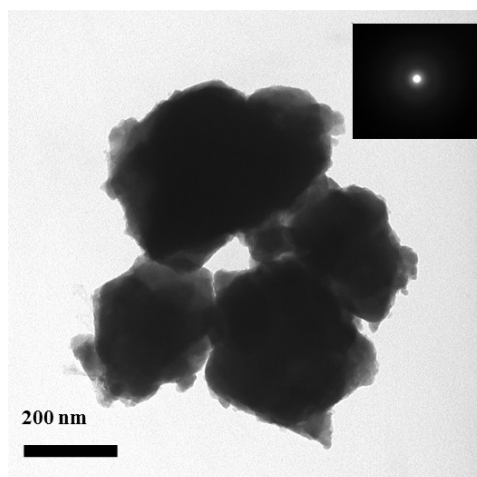

Fig. S5 TEM image of a-MoS<sub>x</sub> and the electron diffraction spectrum of the selected region.

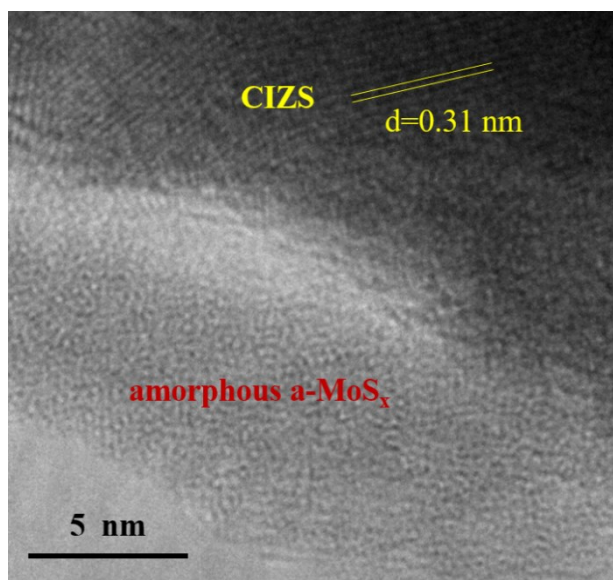

Fig. S6 The high-resolution TEM image of a-MoS<sub>x</sub>/CIZS.

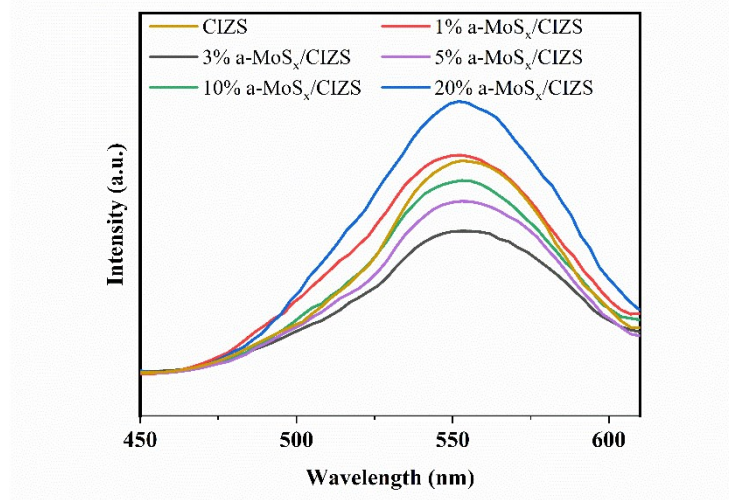

Fig. S7 PL spectra of a-MoS<sub>x</sub>/CIZS (excitation wavelength 380 nm).

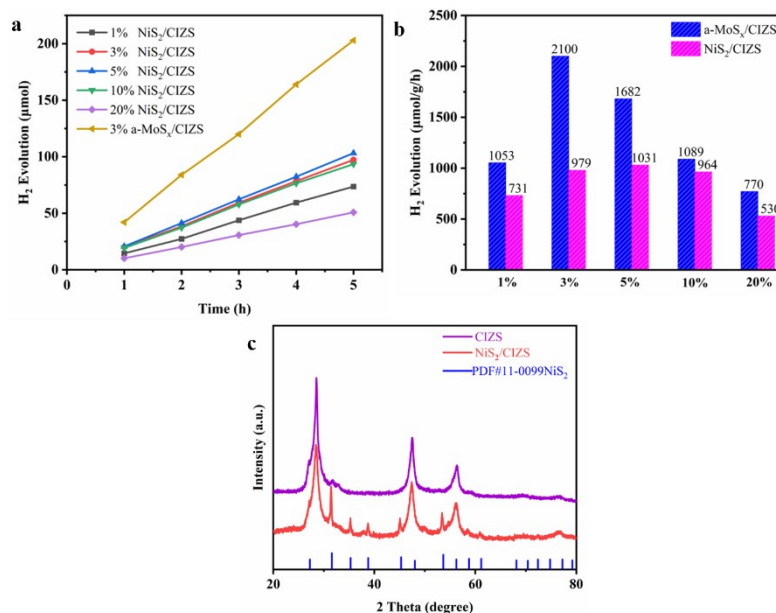

Fig. S8 (a-b)H<sub>2</sub> evolution rates of a-MoS<sub>x</sub>/CIZS and NiS<sub>2</sub>/CIZS;(c) XRD patterns of CIZS and NiS<sub>2</sub>/CIZS.

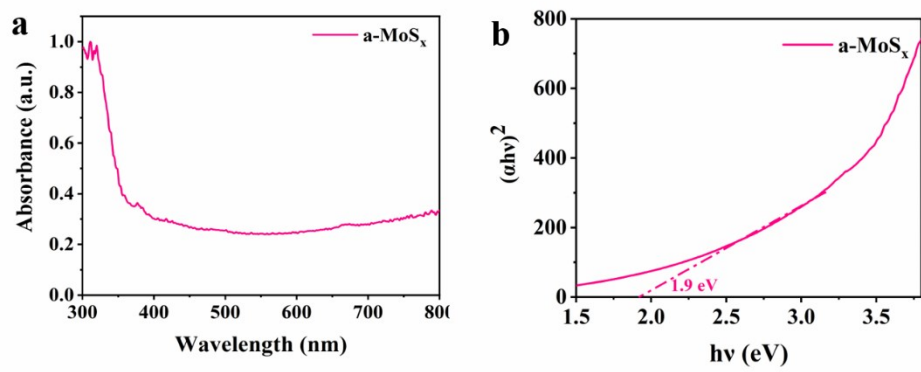

Fig. S9 UV-vis absorption spectrum and Tauc plot of a-MoS<sub>x</sub>.

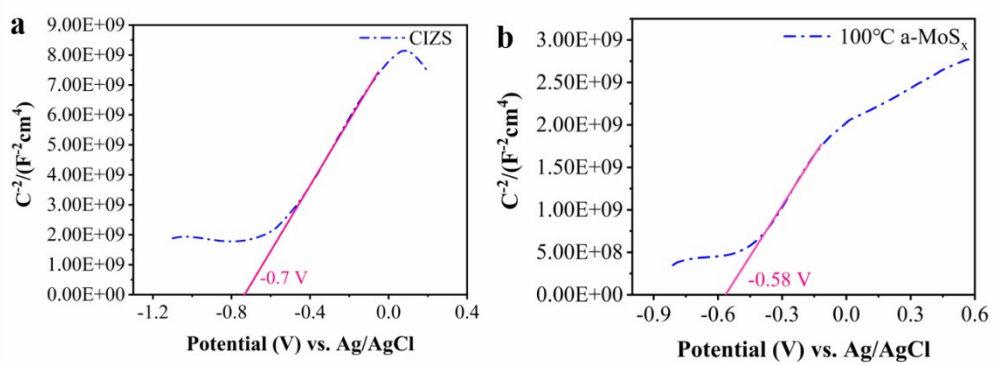

Fig. S10 Mott-Schottky plots of CIZS and a-MoS<sub>x</sub>.
